# Supplementary material for: Ab initio kinetics predictions for the role of pre-reaction complexes in hydrogen abstraction from 2-butanone by OH radicals
Source: Royal Society of Chemistry journal article supplement (doi:10.1039/d0ra05332e), 2020-01-01
Supplement: d0ra05332e1.pdf [file d0ra05332e1.pdf]

Appendix for:

## Ab initio kinetics predictions for the role of pre-reaction complexes in hydrogen abstraction from 2-butanone by OH radical

*Yi Gao,<sup>a\*</sup> Yang Zhao,<sup>b</sup> Qingbao Guan,<sup>c</sup> and Fuke Wang.<sup>b</sup>*

<sup>a</sup>Center for Combustion Energy and Key Laboratory for Thermal Science and Power Engineering of MOE, Tsinghua University, Beijing, 100084, China

<sup>b</sup>Soft Materials, Institute of Materials Research and Engineering, Agency for Science, Technology and Research (A\*STAR), 2 Fusionopolis Way, #08-03 Innovis, Singapore 138634

<sup>c</sup>State Key Laboratory for Modification of Chemical Fibers and Polymer Materials, International Joint Laboratory for Advanced Fiber and Low-dimension Materials, College of Materials Science and Engineering, Donghua University, Shanghai, 201620, P. R. China.

To be submitted to *RSC Advances*

\* Corresponding author E-mail: y-g18@mails.tsinghua.edu.cn (Yi Gao)

**Table of Contents:**

Table 1. Cartesian coordinates (in Å) and frequencies of the optimized geometries at M06-2x-D3/may-cc-pVTZ, T1 diagnostics at DLPNO-CCSD(T)/aug-cc-pVTZ

|       |       |     |
|-------|-------|-----|
| MEK   | ..... | S3  |
| rew1u | ..... | S3  |
| rew1d | ..... | S4  |
| rew2  | ..... | S4  |
| rew3i | ..... | S5  |
| rew3o | ..... | S5  |
| ts1u  | ..... | S6  |
| ts1d  | ..... | S6  |
| ts2   | ..... | S7  |
| ts3i  | ..... | S7  |
| ts3o  | ..... | S8  |
| prw1u | ..... | S8  |
| prw1d | ..... | S9  |
| prw2  | ..... | S9  |
| prw3i | ..... | S10 |
| pr01  | ..... | S10 |
| pr02  | ..... | S11 |
| pr03  | ..... | S11 |

**Table 1.** Cartesian coordinates (in Å) and frequencies of the optimized geometries at M06-2x-D3/may-cc-pVTZ, T1 diagnostics at DLPNO-CCSD(T)/aug-cc-pVTZ.

MEK

| T1 diagnostics: 0.012174707 |             |             |             | Harmonic frequencies: |         |         |        |         |         |  |                                                   |
|-----------------------------|-------------|-------------|-------------|-----------------------|---------|---------|--------|---------|---------|--|---------------------------------------------------|
| Cartesian coordinates:      |             |             |             | 24.84                 | 1012.85 | 1496.51 | 56.22  | 1012.85 | 1496.51 |  |                                                   |
| C                           | 0.52269100  | 0.16841900  | 0.00833900  | 107.97                | 1116.57 | 1503.95 | 126.80 | 1116.57 | 1503.95 |  |                                                   |
| O                           | 0.40152300  | 1.36787100  | 0.00924900  | 212.88                | 1137.86 | 1845.34 | 219.42 | 1137.86 | 1845.34 |  |                                                   |
| C                           | 1.87945900  | -0.49377300 | -0.01369800 | 253.52                | 1201.16 | 3052.36 | 253.52 | 1201.16 | 3052.36 |  |                                                   |
| H                           | 1.99647500  | -1.05219400 | -0.94398100 | 406.35                | 1285.53 | 3067.97 | 406.35 | 1285.53 | 3067.97 |  |                                                   |
| H                           | 2.66050200  | 0.25669200  | 0.06263800  | 475.41                | 1375.77 | 3079.78 | 475.41 | 1375.77 | 3079.78 |  |                                                   |
| H                           | 1.96500600  | -1.21070600 | 0.80358500  | 597.35                | 1399.98 | 3082.07 | 597.35 | 1399.98 | 3082.07 |  |                                                   |
| C                           | -0.67622500 | -0.75709900 | 0.02384000  | 755.35                | 1418.71 | 3131.88 | 755.35 | 1418.71 | 3131.88 |  |                                                   |
| H                           | -0.57092300 | -1.44885900 | -0.81689800 | 781.15                | 1456.34 | 3152.82 | 781.15 | 1456.34 | 3152.82 |  |                                                   |
| H                           | -0.59366200 | -1.37907400 | 0.92017600  | 949.99                | 1470.57 | 3154.92 | 949.99 | 1470.57 | 3154.92 |  |                                                   |
| C                           | -2.00296500 | -0.02127500 | -0.01962800 | 955.61                | 1481.21 | 3180.93 | 955.61 | 1481.21 | 3180.93 |  |                                                   |
| H                           | -2.83511000 | -0.72293000 | -0.00221100 |                       |         |         |        |         |         |  |                                                   |
| H                           | -2.09560400 | 0.65184800  | 0.83044300  |                       |         |         |        |         |         |  |                                                   |
| H                           | -2.07663400 | 0.58462000  | -0.92086100 |                       |         |         |        |         |         |  | <i>(With hindered internal rotation analysis)</i> |

rewlu

| T1 diagnostics: 0.013170465 |             |             |             | Harmonic frequencies: |         |         | Harmonic frequencies: |         |         |  |                                                   |
|-----------------------------|-------------|-------------|-------------|-----------------------|---------|---------|-----------------------|---------|---------|--|---------------------------------------------------|
| Cartesian coordinates:      |             |             |             | 28.18                 | 787.29  | 1491.8  | 34.22                 | 787.29  | 1491.80 |  |                                                   |
| C                           | -0.12834900 | 0.23209100  | -0.06338500 | 83.97                 | 949.82  | 1498.28 | 83.97                 | 949.82  | 1498.28 |  |                                                   |
| O                           | 0.27016400  | -0.90932600 | -0.14774100 | 104.97                | 994.85  | 1504.41 | 103.37                | 994.85  | 1504.41 |  |                                                   |
| C                           | 0.83278600  | 1.39398400  | -0.02005000 | 140.81                | 1014.77 | 1817.87 | 154.46                | 1014.77 | 1817.87 |  |                                                   |
| H                           | 0.33563700  | 2.34546900  | -0.19350400 | 161.24                | 1114.38 | 3049.1  | 161.24                | 1114.38 | 3049.10 |  |                                                   |
| H                           | 1.29648400  | 1.41442400  | 0.96849000  | 220.38                | 1133.43 | 3067.5  | 225.56                | 1133.43 | 3067.50 |  |                                                   |
| H                           | 1.62893400  | 1.24481100  | -0.74833800 | 278.48                | 1199.73 | 3077.51 | 278.48                | 1199.74 | 3077.51 |  |                                                   |
| C                           | -1.59928500 | 0.54695700  | 0.02516100  | 419.85                | 1285.35 | 3081.46 | 419.85                | 1285.35 | 3081.46 |  |                                                   |
| H                           | -1.73909100 | 1.18554000  | 0.90301300  | 478.16                | 1381.93 | 3136.52 | 478.16                | 1381.93 | 3136.52 |  |                                                   |
| H                           | -1.83660000 | 1.18701400  | -0.83065000 | 485.73                | 1397.8  | 3154.7  | 485.73                | 1397.80 | 3154.70 |  |                                                   |
| C                           | -2.48533200 | -0.68340900 | 0.06995000  | 542.7                 | 1421.03 | 3156.98 | 542.70                | 1421.03 | 3156.98 |  |                                                   |
| H                           | -3.53442400 | -0.40011800 | 0.12954500  | 601.67                | 1452.06 | 3169.21 | 601.67                | 1452.06 | 3169.21 |  |                                                   |
| H                           | -2.33879400 | -1.29418600 | -0.81868600 | 752.18                | 1474.12 | 3571.75 | 752.18                | 1474.12 | 3571.75 |  |                                                   |
| H                           | -2.24195500 | -1.30115200 | 0.93244100  |                       |         |         |                       |         |         |  |                                                   |
| O                           | 3.04974900  | -0.62943100 | 0.09828900  |                       |         |         |                       |         |         |  |                                                   |
| H                           | 2.15158700  | -1.00948300 | -0.01675500 |                       |         |         |                       |         |         |  | <i>(With hindered internal rotation analysis)</i> |

rew1d

| T1 diagnostics: 0.012934953 |             |             |             | Harmonic frequencies: |         |         |        |         |         |
|-----------------------------|-------------|-------------|-------------|-----------------------|---------|---------|--------|---------|---------|
| Cartesian coordinates:      |             |             |             | 44.87                 | 780.32  | 1479.39 | 44.87  | 780.32  | 1479.39 |
| C                           | 0.61732500  | -0.68035900 | -0.00000500 | 71.55                 | 953.96  | 1493.8  | 58.61  | 953.96  | 1493.80 |
| O                           | 1.78721400  | -0.97265800 | -0.00008900 | 72.12                 | 954.04  | 1502.19 | 72.12  | 954.04  | 1502.19 |
| C                           | -0.47123000 | -1.72276400 | 0.00006400  | 95.56                 | 1011.37 | 1843.63 | 95.56  | 1011.37 | 1843.63 |
| H                           | -1.11139800 | -1.59102200 | -0.87333000 | 139.34                | 1116.82 | 3039.22 | 159.59 | 1116.82 | 3039.22 |
| H                           | -0.03278200 | -2.71614700 | -0.00001600 | 178.31                | 1139.83 | 3065.48 | 178.31 | 1139.83 | 3065.48 |
| H                           | -1.11121100 | -1.59108600 | 0.87360800  | 202.13                | 1201.5  | 3070.19 | 193.63 | 1201.50 | 3070.19 |
| C                           | 0.16224000  | 0.76667300  | 0.00004300  | 235.75                | 1281.88 | 3078.95 | 235.75 | 1281.88 | 3078.95 |
| H                           | -0.48479300 | 0.89882800  | -0.87346200 | 257.82                | 1371.44 | 3133.06 | 257.82 | 1371.44 | 3133.06 |
| H                           | -0.48473200 | 0.89878800  | 0.87359600  | 409.58                | 1401.86 | 3150.62 | 409.58 | 1401.86 | 3150.62 |
| C                           | 1.31087400  | 1.75911300  | 0.00002100  | 484.3                 | 1417.56 | 3155.18 | 484.30 | 1417.56 | 3155.18 |
| H                           | 0.94092300  | 2.78325800  | 0.00005800  | 597.43                | 1459.04 | 3181.81 | 597.43 | 1459.04 | 3181.81 |
| H                           | 1.94013300  | 1.61584400  | 0.87634000  | 761.3                 | 1469.51 | 3767.33 | 761.30 | 1469.51 | 3767.33 |
| H                           | 1.94006800  | 1.61588300  | -0.87635200 |                       |         |         |        |         |         |
| O                           | -2.83657000 | 0.46240000  | -0.00006000 |                       |         |         |        |         |         |
| H                           | -2.91662400 | 1.43173900  | 0.00000900  |                       |         |         |        |         |         |

*(With hindered internal rotation analysis)*

rew2

| T1 diagnostics: 0.013561083 |             |             |             | Harmonic frequencies: |         |         |        |         |         |
|-----------------------------|-------------|-------------|-------------|-----------------------|---------|---------|--------|---------|---------|
| Cartesian coordinates:      |             |             |             | 23.7                  | 813.62  | 1494.85 | 23.70  | 813.62  | 1494.85 |
| C                           | -0.33645600 | -0.61857100 | 0.07245900  | 55.33                 | 956.1   | 1509.54 | 55.33  | 956.10  | 1509.54 |
| O                           | 0.64392200  | -1.28189100 | -0.18638400 | 75.92                 | 960.94  | 1511.12 | 75.92  | 960.94  | 1511.12 |
| C                           | -1.71182000 | -1.22970400 | 0.02446900  | 156.66                | 1024.52 | 1821.08 | 156.66 | 1024.52 | 1821.08 |
| H                           | -2.22328600 | -0.87938400 | -0.87424400 | 178.76                | 1103.86 | 3055.7  | 178.76 | 1103.86 | 3055.70 |
| H                           | -1.63208700 | -2.31186200 | -0.00930000 | 224.36                | 1133.91 | 3068.81 | 249.84 | 1133.91 | 3068.81 |
| H                           | -2.30935800 | -0.91233400 | 0.87920800  | 278.9                 | 1247.04 | 3073.07 | 278.90 | 1247.04 | 3073.07 |
| C                           | -0.23321600 | 0.83882800  | 0.45663300  | 417.2                 | 1303.06 | 3119.19 | 417.20 | 1303.06 | 3119.19 |
| H                           | -0.43266000 | 0.89309100  | 1.53136500  | 486.94                | 1358.31 | 3133.17 | 486.94 | 1358.31 | 3133.17 |
| H                           | 0.79410900  | 1.16558800  | 0.29915300  | 537.43                | 1395.07 | 3145.22 | 537.43 | 1395.07 | 3145.22 |
| C                           | -1.21753900 | 1.73656100  | -0.29193400 | 563.74                | 1417.6  | 3152.88 | 563.74 | 1417.60 | 3152.88 |
| H                           | -1.06956700 | 2.77524900  | -0.00406000 | 753.84                | 1464.54 | 3185.74 | 753.84 | 1464.54 | 3185.74 |
| H                           | -1.07007700 | 1.66399100  | -1.36930500 | 772.83                | 1475.2  | 3579.45 | 772.83 | 1475.20 | 3579.45 |
| H                           | -2.25114500 | 1.47349200  | -0.07064700 |                       |         |         |        |         |         |
| O                           | 2.96425200  | 0.30656200  | -0.03849900 |                       |         |         |        |         |         |
| H                           | 2.32286600  | -0.42788300 | -0.15286600 |                       |         |         |        |         |         |

*(With hindered internal rotation analysis)*

rew3i

| T1 diagnostics: 0.013150719 |             |             |             | Harmonic frequencies: |         |         |        |         |         |
|-----------------------------|-------------|-------------|-------------|-----------------------|---------|---------|--------|---------|---------|
| Cartesian coordinates:      |             |             |             | 46.56                 | 921.39  | 1500.43 | 46.56  | 921.39  | 1500.43 |
| C                           | -0.76366900 | -0.37947500 | 0.10850000  | 91.99                 | 983.38  | 1506    | 91.99  | 983.38  | 1506.00 |
| O                           | -0.11900700 | -1.35897700 | -0.19978900 | 145.22                | 994.41  | 1598.66 | 145.22 | 994.41  | 1598.66 |
| C                           | -2.24927800 | -0.32120100 | -0.10962500 | 165.76                | 1081.99 | 1834    | 165.76 | 1081.99 | 1834.00 |
| H                           | -2.51187500 | 0.59873800  | -0.63448200 | 174.12                | 1110.59 | 3064.71 | 177.70 | 1110.59 | 3064.71 |
| H                           | -2.58852100 | -1.18889000 | -0.66676200 | 221.46                | 1157.39 | 3068.34 | 221.46 | 1157.39 | 3068.34 |
| H                           | -2.74680200 | -0.28485300 | 0.86155000  | 249.46                | 1235.95 | 3092.11 | 249.46 | 1235.95 | 3092.11 |
| C                           | -0.09793300 | 0.84734100  | 0.68505100  | 397.59                | 1291.84 | 3126.99 | 397.59 | 1291.84 | 3126.99 |
| H                           | -0.82375200 | 1.43858600  | 1.24326100  | 512.47                | 1365.73 | 3142    | 512.47 | 1365.73 | 3142.00 |
| H                           | 0.69473400  | 0.52581200  | 1.36001100  | 542.31                | 1396.04 | 3150.02 | 542.31 | 1396.04 | 3150.02 |
| C                           | 0.50337600  | 1.68119400  | -0.45331700 | 606.16                | 1420.52 | 3186.21 | 606.16 | 1420.52 | 3186.21 |
| H                           | 0.98201600  | 2.57286900  | -0.05423900 | 781.41                | 1463.92 | 3218.72 | 781.41 | 1463.92 | 3218.72 |
| H                           | 1.25464700  | 1.10457000  | -0.99221000 | 803.37                | 1477.65 | 3561.53 | 803.37 | 1477.65 | 3561.53 |
| H                           | -0.26352200 | 1.99599700  | -1.16187000 |                       |         |         |        |         |         |
| O                           | 2.60732600  | -0.71120600 | 0.03832900  |                       |         |         |        |         |         |
| H                           | 1.74154800  | -1.16852100 | -0.04723000 |                       |         |         |        |         |         |

*(With hindered internal rotation analysis)*

rew3o

| T1 diagnostics: 0.012838113 |             |             |             | Harmonic frequencies: |         |         |        |         |         |
|-----------------------------|-------------|-------------|-------------|-----------------------|---------|---------|--------|---------|---------|
| Cartesian coordinates:      |             |             |             | 27.12                 | 783.53  | 1480.65 | 44.72  | 783.53  | 1480.65 |
| C                           | 1.17736000  | 0.05908400  | -0.10183500 | 34.88                 | 950.17  | 1502.28 | 67.73  | 950.17  | 1502.28 |
| O                           | 1.37408200  | 0.99259500  | -0.83997900 | 76.69                 | 957.77  | 1505.64 | 76.69  | 957.77  | 1505.64 |
| C                           | 2.19802200  | -1.03749600 | 0.08275600  | 81.06                 | 1014.77 | 1842.19 | 81.06  | 1014.77 | 1842.19 |
| H                           | 1.73847800  | -2.01357300 | -0.07569700 | 117.13                | 1117.17 | 3057.61 | 125.33 | 1117.17 | 3057.61 |
| H                           | 3.02594500  | -0.89507700 | -0.60525000 | 129.35                | 1136.15 | 3069.17 | 129.35 | 1136.15 | 3069.17 |
| H                           | 2.56752500  | -1.01931200 | 1.10949300  | 208.27                | 1204.01 | 3069.62 | 208.27 | 1204.01 | 3069.62 |
| C                           | -0.10476700 | -0.07789100 | 0.69034400  | 260.04                | 1287.32 | 3088.89 | 260.04 | 1287.32 | 3088.89 |
| H                           | -0.58657800 | -1.00705700 | 0.37284800  | 279.13                | 1376.64 | 3133.04 | 279.13 | 1376.64 | 3133.04 |
| H                           | 0.16321100  | -0.23171800 | 1.73931900  | 409.04                | 1400.28 | 3137.82 | 409.04 | 1400.28 | 3137.83 |
| C                           | -1.03966200 | 1.10574400  | 0.52028500  | 475.02                | 1412.96 | 3144.99 | 475.02 | 1412.96 | 3144.99 |
| H                           | -1.96529000 | 0.94799400  | 1.07309800  | 598.56                | 1454.99 | 3181.72 | 598.56 | 1454.99 | 3181.72 |
| H                           | -0.57503100 | 2.02412600  | 0.87567900  | 753.76                | 1471.84 | 3772.64 | 753.76 | 1471.84 | 3772.64 |
| H                           | -1.26933500 | 1.25675900  | -0.53424600 |                       |         |         |        |         |         |
| O                           | -3.02174000 | -0.89435600 | -0.42595800 |                       |         |         |        |         |         |
| H                           | -3.30337600 | -0.14471100 | -0.97704600 |                       |         |         |        |         |         |

*(With hindered internal rotation analysis)*

tslu

| T1 diagnostics: 0.019259890 |             |             |             | Harmonic frequencies: |         |         |          |         |         |
|-----------------------------|-------------|-------------|-------------|-----------------------|---------|---------|----------|---------|---------|
| Cartesian coordinates:      |             |             |             | -1466.92              | 815.45  | 1454.9  | -1466.92 | 815.45  | 1454.90 |
| C                           | 0.09734400  | 0.10361100  | 0.09092100  | 33.07                 | 906.17  | 1480.51 | 41.06    | 906.17  | 1480.51 |
| O                           | -0.11994200 | -1.07695000 | 0.22733000  | 86.71                 | 951.33  | 1496.75 | 92.45    | 951.33  | 1496.75 |
| C                           | -1.00735400 | 1.12137600  | 0.16077700  | 147.13                | 1007.26 | 1504.11 | 147.13   | 1007.26 | 1504.11 |
| H                           | -0.90403000 | 1.94089000  | -0.54676800 | 217.11                | 1015.29 | 1820.52 | 223.84   | 1015.29 | 1820.52 |
| H                           | -2.04435300 | 0.54273800  | -0.09297200 | 254.45                | 1119.63 | 3053.25 | 254.45   | 1119.63 | 3053.25 |
| H                           | -1.13659300 | 1.49467100  | 1.17603900  | 280.84                | 1125.84 | 3081.12 | 280.84   | 1125.84 | 3081.12 |
| C                           | 1.49069500  | 0.64086700  | -0.14266700 | 365.38                | 1220.83 | 3082.86 | 365.38   | 1220.83 | 3082.86 |
| H                           | 1.47721900  | 1.13487900  | -1.11915000 | 435.74                | 1223.44 | 3103.45 | 432.35   | 1223.44 | 3103.45 |
| H                           | 1.66307700  | 1.44196500  | 0.58185100  | 482.23                | 1287.74 | 3154.6  | 482.23   | 1287.74 | 3154.60 |
| C                           | 2.56584100  | -0.42825500 | -0.07320400 | 585.28                | 1381.28 | 3157.98 | 585.28   | 1381.28 | 3157.98 |
| H                           | 3.54808300  | 0.00350300  | -0.25573800 | 704.36                | 1418.35 | 3177.01 | 704.36   | 1418.35 | 3177.01 |
| H                           | 2.57128000  | -0.90538700 | 0.90506100  | 751.5                 | 1432.52 | 3730.56 | 751.50   | 1432.52 | 3730.56 |
| H                           | 2.38184000  | -1.20468100 | -0.81288400 |                       |         |         |          |         |         |
| O                           | -2.90036500 | -0.41515300 | -0.22828100 |                       |         |         |          |         |         |
| H                           | -2.27322100 | -1.13734900 | -0.04278800 |                       |         |         |          |         |         |

*(With hindered internal rotation analysis)*

tsld

| T1 diagnostics: 0.019310363 |             |             |             | Harmonic frequencies: |         |         |         |         |         |
|-----------------------------|-------------|-------------|-------------|-----------------------|---------|---------|---------|---------|---------|
| Cartesian coordinates:      |             |             |             | -867.67               | 795.75  | 1455.3  | -867.67 | 795.75  | 1455.30 |
| C                           | -0.25382100 | 0.63562500  | 0.07344200  | 37.69                 | 953.2   | 1460.96 | 47.09   | 953.20  | 1460.96 |
| O                           | -0.85871100 | 1.46836700  | -0.55451000 | 57.14                 | 976.59  | 1496.12 | 57.14   | 976.59  | 1496.12 |
| C                           | 1.15531600  | 0.89230200  | 0.53588600  | 97.02                 | 1017.64 | 1504.2  | 76.27   | 1017.64 | 1504.20 |
| H                           | 1.80286800  | 0.09170200  | -0.02661900 | 108.98                | 1052.57 | 1832.81 | 132.53  | 1052.57 | 1832.81 |
| H                           | 1.51134300  | 1.87613800  | 0.24718900  | 208                   | 1117.33 | 3053.49 | 213.13  | 1117.33 | 3053.49 |
| H                           | 1.29435500  | 0.68657800  | 1.59571500  | 250.61                | 1154.16 | 3080.46 | 250.61  | 1154.16 | 3080.46 |
| C                           | -0.83867400 | -0.71126400 | 0.42610300  | 293.94                | 1209.23 | 3084.05 | 293.94  | 1209.23 | 3084.05 |
| H                           | -0.14214200 | -1.46903900 | 0.05529300  | 406.68                | 1282.43 | 3111.87 | 406.68  | 1282.43 | 3111.87 |
| H                           | -0.81257000 | -0.80383900 | 1.51606200  | 485.15                | 1311.32 | 3154.17 | 485.15  | 1311.32 | 3154.17 |
| C                           | -2.24119000 | -0.91434600 | -0.11698000 | 584                   | 1385.64 | 3154.64 | 584.00  | 1385.64 | 3154.64 |
| H                           | -2.62193400 | -1.89597900 | 0.15890500  | 694.78                | 1393.9  | 3199.64 | 694.78  | 1393.90 | 3199.64 |
| H                           | -2.91856400 | -0.15562300 | 0.27047100  | 779.65                | 1419.21 | 3793.3  | 779.65  | 1419.21 | 3793.30 |
| H                           | -2.24721500 | -0.83130300 | -1.20220700 |                       |         |         |         |         |         |
| O                           | 2.58742100  | -0.98017900 | -0.47043100 |                       |         |         |         |         |         |
| H                           | 3.37439800  | -0.81804000 | 0.07401100  |                       |         |         |         |         |         |

*(With hindered internal rotation analysis)*

ts2

| T1 diagnostics: 0.018869895 |             |             |             | Harmonic frequencies: |         |         |         |         |         |
|-----------------------------|-------------|-------------|-------------|-----------------------|---------|---------|---------|---------|---------|
| Cartesian coordinates:      |             |             |             | -805.94               | 831.6   | 1479.76 | -805.94 | 831.60  | 1479.76 |
| C                           | -0.81783100 | -0.27404700 | 0.05967700  | 34.12                 | 934.58  | 1485.37 | 53.20   | 934.58  | 1485.37 |
| O                           | -1.01057700 | -0.95807600 | 1.03517900  | 69.79                 | 958.29  | 1493.76 | 69.79   | 958.29  | 1493.76 |
| C                           | -1.85996700 | 0.66181300  | -0.49292700 | 112.56                | 1018    | 1562.23 | 112.56  | 1018.00 | 1562.23 |
| H                           | -2.16525700 | 0.32113000  | -1.48378000 | 129.84                | 1087.83 | 1833.44 | 144.90  | 1087.83 | 1833.45 |
| H                           | -2.72254800 | 0.69104300  | 0.16578300  | 185.76                | 1118.1  | 3066.55 | 188.87  | 1118.10 | 3066.55 |
| H                           | -1.43302000 | 1.65906900  | -0.60800700 | 194.86                | 1179.63 | 3072.1  | 197.25  | 1179.63 | 3072.10 |
| C                           | 0.51339200  | -0.28566300 | -0.65140500 | 255.97                | 1219.2  | 3098.09 | 255.97  | 1219.20 | 3098.09 |
| H                           | 0.38058200  | -0.20363800 | -1.73186700 | 404.16                | 1328.52 | 3132.48 | 404.16  | 1328.52 | 3132.48 |
| H                           | 0.96785300  | 0.74755100  | -0.38219800 | 456.71                | 1379.75 | 3138.65 | 456.71  | 1379.75 | 3138.65 |
| C                           | 1.45619500  | -1.38611500 | -0.23053100 | 597.08                | 1403.01 | 3160.27 | 597.08  | 1403.01 | 3160.27 |
| H                           | 2.42948400  | -1.26596000 | -0.70182800 | 672.36                | 1417.46 | 3182.49 | 672.36  | 1417.46 | 3182.49 |
| H                           | 1.58084900  | -1.39299900 | 0.85060400  | 782.24                | 1468.84 | 3775.19 | 782.24  | 1468.84 | 3775.19 |
| H                           | 1.05187800  | -2.35888100 | -0.51313700 |                       |         |         |         |         |         |
| O                           | 1.35803500  | 1.95205400  | 0.34749100  |                       |         |         |         |         |         |
| H                           | 1.37978200  | 1.55493200  | 1.23418100  |                       |         |         |         |         |         |

*(With hindered internal rotation analysis)*

ts3i

| T1 diagnostics: 0.019350922 |             |             |             | Harmonic frequencies: |         |         |          |         |         |
|-----------------------------|-------------|-------------|-------------|-----------------------|---------|---------|----------|---------|---------|
| Cartesian coordinates:      |             |             |             | -1110.13              | 853.79  | 1453.32 | -1110.13 | 853.79  | 1453.32 |
| C                           | -0.90236800 | -0.15053500 | -0.10213000 | 44.72                 | 934.39  | 1463.49 | 44.72    | 934.39  | 1463.49 |
| O                           | -0.38934200 | -1.09152000 | -0.65971300 | 95.75                 | 974.19  | 1467.92 | 118.55   | 974.19  | 1467.92 |
| C                           | -2.35336500 | -0.16610100 | 0.30153600  | 122.3                 | 983.84  | 1480.41 | 122.30   | 983.84  | 1480.41 |
| H                           | -2.90745600 | 0.51976300  | -0.34219000 | 154.28                | 1036.89 | 1834.09 | 154.28   | 1036.89 | 1834.09 |
| H                           | -2.75929500 | -1.16751200 | 0.19615100  | 246.88                | 1126.94 | 3044.16 | 246.88   | 1126.94 | 3044.16 |
| H                           | -2.47030500 | 0.18790200  | 1.32586300  | 344.68                | 1140.43 | 3068.71 | 344.68   | 1140.43 | 3068.71 |
| C                           | -0.12836100 | 1.10999500  | 0.22435400  | 402.26                | 1204.81 | 3078.14 | 402.26   | 1204.81 | 3078.14 |
| H                           | -0.73505500 | 1.96495700  | -0.09283600 | 442.37                | 1257.1  | 3111.3  | 442.37   | 1257.10 | 3111.30 |
| H                           | -0.07741200 | 1.17833000  | 1.31528000  | 471.41                | 1317.71 | 3133.74 | 471.41   | 1317.71 | 3133.74 |
| C                           | 1.24918000  | 1.15756900  | -0.38393400 | 596.24                | 1379.03 | 3183.83 | 596.24   | 1379.03 | 3183.83 |
| H                           | 1.80805500  | 2.04981600  | -0.11261700 | 715.58                | 1404.35 | 3185.56 | 715.58   | 1404.35 | 3185.56 |
| H                           | 1.89216900  | 0.26022400  | 0.06371800  | 762.04                | 1436.97 | 3744.08 | 762.04   | 1436.97 | 3744.08 |
| H                           | 1.25173600  | 0.99800300  | -1.45921400 |                       |         |         |          |         |         |
| O                           | 2.29019500  | -0.94097200 | 0.51322800  |                       |         |         |          |         |         |
| H                           | 1.60021800  | -1.43711000 | 0.03877000  |                       |         |         |          |         |         |

*(With hindered internal rotation analysis)*

ts3o

| T1 diagnostics: 0.019076714 |             |             |             | Harmonic frequencies: |         |         |         |         |         |
|-----------------------------|-------------|-------------|-------------|-----------------------|---------|---------|---------|---------|---------|
| Cartesian coordinates:      |             |             |             | -744.05               | 830.38  | 1457.45 | -744.05 | 830.38  | 1457.45 |
| C                           | 1.32726900  | 0.10153900  | -0.02532200 | 40.25                 | 938.39  | 1470.47 | 56.13   | 938.39  | 1470.47 |
| O                           | 1.57212100  | 1.27984300  | -0.08511600 | 54.08                 | 952.11  | 1480.52 | 54.08   | 952.11  | 1480.52 |
| C                           | 2.41517200  | -0.94362600 | -0.01062600 | 63.79                 | 1020.13 | 1482.82 | 77.50   | 1020.13 | 1482.82 |
| H                           | 2.21543900  | -1.71385200 | -0.75596800 | 85.2                  | 1085.61 | 1842.1  | 85.20   | 1085.61 | 1842.10 |
| H                           | 3.37871700  | -0.47861600 | -0.19617000 | 115.07                | 1134.76 | 3060.49 | 133.89  | 1134.76 | 3060.49 |
| H                           | 2.42785700  | -1.43468800 | 0.96398300  | 220.7                 | 1196.62 | 3069.64 | 220.70  | 1196.62 | 3069.64 |
| C                           | -0.09772300 | -0.41884900 | 0.04460100  | 320.74                | 1252.2  | 3094.64 | 320.74  | 1252.20 | 3094.64 |
| H                           | -0.26703100 | -1.02923000 | -0.84692600 | 397.31                | 1281.99 | 3113.36 | 397.31  | 1281.99 | 3113.36 |
| H                           | -0.16682200 | -1.10917400 | 0.88893300  | 473.42                | 1317.08 | 3133.64 | 473.42  | 1317.08 | 3133.64 |
| C                           | -1.12197100 | 0.68303600  | 0.14669900  | 594.08                | 1369.92 | 3180.18 | 594.08  | 1369.92 | 3180.18 |
| H                           | -2.16970700 | 0.16762700  | 0.15997900  | 705.11                | 1394.21 | 3183    | 705.11  | 1394.22 | 3183.00 |
| H                           | -1.05565600 | 1.24901300  | 1.07287100  | 755.06                | 1419.81 | 3796.87 | 755.06  | 1419.81 | 3796.87 |
| H                           | -1.10096700 | 1.35815900  | -0.70479900 |                       |         |         |         |         |         |
| O                           | -3.39290100 | -0.49840700 | -0.03687600 |                       |         |         |         |         |         |
| H                           | -3.83208200 | 0.20667800  | -0.53808200 |                       |         |         |         |         |         |

*(With hindered internal rotation analysis)*

prwlu

| T1 diagnostics: 0.013922019 |             |             |             | Harmonic frequencies: |         |         |        |         |         |
|-----------------------------|-------------|-------------|-------------|-----------------------|---------|---------|--------|---------|---------|
| Cartesian coordinates:      |             |             |             | 42.99                 | 752.26  | 1495.34 | 43.17  | 752.26  | 1495.34 |
| C                           | 0.21192400  | 0.32180300  | -0.00006700 | 66.81                 | 801.12  | 1504.29 | 71.06  | 801.12  | 1504.29 |
| O                           | -0.28816900 | -0.80183200 | -0.00021400 | 111.99                | 819.77  | 1634.6  | 111.99 | 819.77  | 1634.60 |
| C                           | -0.61300000 | 1.49989800  | -0.00006400 | 144.58                | 994.72  | 1669.35 | 144.62 | 994.72  | 1669.35 |
| H                           | -0.16374200 | 2.48215200  | 0.00015200  | 155.74                | 1031.58 | 3053.55 | 155.74 | 1031.58 | 3053.55 |
| H                           | -3.67525300 | -1.18651800 | 0.00061300  | 221.4                 | 1083.95 | 3079.79 | 227.46 | 1083.95 | 3079.79 |
| H                           | -1.68870200 | 1.39559500  | -0.00028000 | 282.59                | 1113.61 | 3083.67 | 282.59 | 1113.61 | 3083.67 |
| C                           | 1.71453600  | 0.50802600  | 0.00011700  | 392.11                | 1239.97 | 3153.61 | 396.73 | 1239.97 | 3153.61 |
| H                           | 1.97226900  | 1.11791600  | -0.87032400 | 412.05                | 1278.6  | 3154.33 | 412.05 | 1278.60 | 3154.33 |
| H                           | 1.97207700  | 1.11771100  | 0.87075800  | 428.31                | 1397.15 | 3166.91 | 428.31 | 1397.15 | 3166.91 |
| C                           | 2.47767300  | -0.80374400 | 0.00004600  | 510.05                | 1418.01 | 3285.37 | 510.05 | 1418.01 | 3285.37 |
| H                           | 3.55110500  | -0.62347000 | 0.00018200  | 582.98                | 1461.55 | 3696.65 | 583.74 | 1461.55 | 3696.65 |
| H                           | 2.22323000  | -1.39668700 | 0.87658300  | 605.54                | 1486.6  | 3949.17 | 605.54 | 1486.60 | 3949.17 |
| H                           | 2.22342200  | -1.39648100 | -0.87668700 |                       |         |         |        |         |         |
| O                           | -3.08415600 | -0.43251900 | 0.00006900  |                       |         |         |        |         |         |
| H                           | -2.18260700 | -0.79130200 | -0.00002400 |                       |         |         |        |         |         |

*(With hindered internal rotation analysis)*



prw1d

| T1 diagnostics: 0.019350922 |             |             |             | Harmonic frequencies: |         |         |        |         |         |
|-----------------------------|-------------|-------------|-------------|-----------------------|---------|---------|--------|---------|---------|
| Cartesian coordinates:      |             |             |             | 34.6                  | 792.88  | 1503.23 | 34.60  | 792.88  | 1503.23 |
| C                           | 0.83280300  | -0.44429000 | 0.12031400  | 63.8                  | 807.57  | 1509.34 | 63.80  | 807.57  | 1509.34 |
| O                           | 0.09045600  | -1.37357400 | -0.20093100 | 104.21                | 817.06  | 1633.35 | 104.21 | 817.06  | 1633.35 |
| C                           | 2.24918500  | -0.56225500 | -0.08848900 | 133                   | 990.2   | 1649.61 | 133.00 | 990.20  | 1649.61 |
| H                           | -1.74319300 | -0.93277900 | -0.06548000 | 166.1                 | 1004.48 | 3063.6  | 166.10 | 1004.48 | 3063.60 |
| H                           | 2.63553800  | -1.47100600 | -0.52440500 | 221.51                | 1075.57 | 3083.31 | 221.51 | 1075.57 | 3083.31 |
| H                           | 2.92607800  | 0.23603800  | 0.17608800  | 239.41                | 1114.01 | 3130.37 | 239.41 | 1114.01 | 3130.37 |
| C                           | 0.28063000  | 0.84543700  | 0.67662400  | 376.73                | 1249.73 | 3146.9  | 376.73 | 1249.73 | 3146.90 |
| H                           | -0.59898800 | 0.61267700  | 1.27476500  | 385.01                | 1310.5  | 3157.78 | 383.83 | 1310.50 | 3157.78 |
| H                           | 1.02530800  | 1.32502400  | 1.31253100  | 420.05                | 1355.98 | 3178.76 | 420.05 | 1355.98 | 3178.76 |
| C                           | -0.11569900 | 1.77463000  | -0.47591700 | 538.18                | 1407.69 | 3295.01 | 538.18 | 1407.69 | 3295.01 |
| H                           | -0.50491600 | 2.71362000  | -0.08726200 | 581.65                | 1476.75 | 3694.98 | 581.65 | 1476.75 | 3694.98 |
| H                           | 0.74009400  | 1.99769600  | -1.11482700 | 641.02                | 1489.59 | 3945.52 | 641.02 | 1489.59 | 3945.52 |
| H                           | -0.89362300 | 1.30689300  | -1.07688600 |                       |         |         |        |         |         |
| O                           | -2.56402500 | -0.42907000 | 0.05240500  |                       |         |         |        |         |         |
| H                           | -3.27926200 | -1.04814000 | -0.10150700 |                       |         |         |        |         |         |

*(With hindered internal rotation analysis)*

prw2

| T1 diagnostics: 0.014235692 |             |             |             | Harmonic frequencies: |         |         |        |         |         |
|-----------------------------|-------------|-------------|-------------|-----------------------|---------|---------|--------|---------|---------|
| Cartesian coordinates:      |             |             |             | 13.14                 | 642.94  | 1480.17 | 38.57  | 642.94  | 1480.17 |
| C                           | -0.96828600 | -0.23413600 | -0.00433300 | 44.57                 | 833.51  | 1488.6  | 78.55  | 833.51  | 1488.60 |
| O                           | -0.06396600 | -1.06804600 | -0.02453300 | 111.27                | 964.25  | 1642.34 | 111.27 | 964.25  | 1642.34 |
| C                           | -2.41525600 | -0.66150100 | 0.01095600  | 138.41                | 972.28  | 1674.73 | 138.41 | 972.28  | 1674.73 |
| H                           | -2.94068300 | -0.24735200 | -0.85035800 | 151.23                | 1037.67 | 3046.3  | 160.30 | 1037.67 | 3046.30 |
| H                           | -2.47550300 | -1.74526500 | -0.00975900 | 160.3                 | 1083.98 | 3069.01 | 161.60 | 1083.98 | 3069.01 |
| H                           | -2.90973900 | -0.28373500 | 0.90676300  | 164.06                | 1128.8  | 3086.89 | 175.42 | 1128.80 | 3086.89 |
| C                           | -0.67782600 | 1.17547200  | 0.00633500  | 255.24                | 1232.3  | 3131.85 | 255.24 | 1232.30 | 3131.85 |
| H                           | -1.51125300 | 1.86527900  | 0.02747400  | 363.07                | 1383.52 | 3166.48 | 363.07 | 1383.52 | 3166.48 |
| H                           | 3.20716900  | -1.55793800 | 0.01943900  | 419.55                | 1395.49 | 3183.7  | 419.55 | 1395.49 | 3183.70 |
| C                           | 0.71363500  | 1.67493400  | -0.00796600 | 513.5                 | 1463.8  | 3201.3  | 513.50 | 1463.80 | 3201.30 |
| H                           | 1.26924700  | 1.30040400  | 0.85661300  | 577.38                | 1466.77 | 3715.77 | 577.38 | 1466.77 | 3715.77 |
| H                           | 1.25678300  | 1.28605200  | -0.87364900 | 610.84                | 1475.46 | 3945.37 | 610.84 | 1475.46 | 3945.37 |
| H                           | 0.75485600  | 2.76024700  | -0.01603800 |                       |         |         |        |         |         |
| O                           | 2.76624100  | -0.70703000 | 0.01373500  |                       |         |         |        |         |         |
| H                           | 1.81732100  | -0.90569400 | -0.00405300 |                       |         |         |        |         |         |

*(With hindered internal rotation analysis)*

prw3i &amp; prw3o

| T1 diagnostics: 0.013906404 |             |             |             | Harmonic frequencies: |         |         |        |         |                                                   |
|-----------------------------|-------------|-------------|-------------|-----------------------|---------|---------|--------|---------|---------------------------------------------------|
| Cartesian coordinates:      |             |             |             | 43.72                 | 606.65  | 1467.21 | 43.72  | 606.65  | 1467.21                                           |
| C                           | 0.83976200  | -0.10296600 | 0.16782100  | 99.93                 | 760.3   | 1480.75 | 99.93  | 760.30  | 1480.75                                           |
| O                           | 0.33822800  | -0.75124000 | 1.05577600  | 114.99                | 817.61  | 1633.1  | 114.99 | 817.61  | 1633.10                                           |
| C                           | 2.19551800  | -0.43900400 | -0.39145400 | 126.14                | 962.48  | 1832.81 | 126.14 | 962.48  | 1832.81                                           |
| H                           | 2.91062100  | 0.31747800  | -0.06215800 | 143.27                | 1003.87 | 3010.1  | 144.34 | 1003.87 | 3010.10                                           |
| H                           | 2.51385700  | -1.41566500 | -0.04028100 | 162.68                | 1045.88 | 3030.04 | 162.68 | 1045.88 | 3030.04                                           |
| H                           | 2.17502000  | -0.41163200 | -1.48113700 | 195.79                | 1126.4  | 3067.45 | 195.79 | 1126.40 | 3067.45                                           |
| C                           | 0.13261300  | 1.08404900  | -0.45335100 | 255.25                | 1196.32 | 3132.71 | 255.25 | 1196.32 | 3132.71                                           |
| H                           | 0.88095000  | 1.85482000  | -0.67847100 | 273.97                | 1214.82 | 3183.88 | 273.97 | 1214.82 | 3183.88                                           |
| H                           | -0.21685200 | 0.73633500  | -1.43504600 | 405.88                | 1376.02 | 3185.66 | 405.88 | 1376.02 | 3185.66                                           |
| C                           | -0.99168300 | 1.61242700  | 0.35361000  | 428.21                | 1405.53 | 3293.64 | 428.21 | 1405.53 | 3293.64                                           |
| H                           | -1.62762100 | 2.38685800  | -0.04458800 | 473.31                | 1424.18 | 3811.78 | 473.31 | 1424.18 | 3811.78                                           |
| H                           | -2.74299900 | -0.52663300 | -0.33162500 | 498.4                 | 1456.27 | 3937.07 | 498.40 | 1456.27 | 3937.07                                           |
| H                           | -1.11205600 | 1.30562300  | 1.38039300  |                       |         |         |        |         | <i>(With hindered internal rotation analysis)</i> |
| O                           | -2.12833500 | -1.24266400 | -0.50664100 |                       |         |         |        |         |                                                   |
| H                           | -1.51732000 | -1.22298200 | 0.24008100  |                       |         |         |        |         |                                                   |

pr01 CH<sub>2</sub>·COCH<sub>2</sub>CH<sub>3</sub>

| T1 diagnostics: 0.015734770 |             |             |             | Harmonic frequencies: |         |         |        |         |                                                   |
|-----------------------------|-------------|-------------|-------------|-----------------------|---------|---------|--------|---------|---------------------------------------------------|
| Cartesian coordinates:      |             |             |             | 68.47                 | 981.34  | 1495.7  | 72.61  | 981.34  | 1495.7                                            |
| C                           | 0.58637200  | 0.11049000  | -0.00000100 | 218.32                | 1026.86 | 1503.1  | 224.52 | 1026.86 | 1503.1                                            |
| O                           | 0.51361400  | 1.33180500  | -0.00000100 | 256.29                | 1082.15 | 1679.23 | 256.29 | 1082.15 | 1679.23                                           |
| C                           | 1.86854600  | -0.54739100 | 0.00000400  | 374.64                | 1110.99 | 3052.02 | 377.92 | 1110.99 | 3052.02                                           |
| H                           | 2.76194200  | 0.05801400  | -0.00000400 | 410.92                | 1222.39 | 3078.44 | 410.92 | 1222.39 | 3078.44                                           |
| H                           | 1.95033200  | -1.62442600 | 0.00000700  | 504.91                | 1279.83 | 3082.49 | 504.91 | 1279.83 | 3082.49                                           |
| C                           | -0.65310400 | -0.76452900 | -0.00000400 | 593.29                | 1388.74 | 3151.87 | 593.29 | 1388.74 | 3151.87                                           |
| H                           | -0.59623500 | -1.42355100 | -0.87095900 | 722.29                | 1419.09 | 3153.3  | 722.29 | 1419.09 | 3153.3                                            |
| H                           | -0.59623300 | -1.42356600 | 0.87093900  | 789.5                 | 1463.69 | 3174.61 | 789.5  | 1463.69 | 3174.61                                           |
| C                           | -1.94130200 | 0.03783000  | 0.00000300  | 811.58                | 1472.13 | 3291.54 | 811.58 | 1472.13 | 3291.54                                           |
| H                           | -2.80682100 | -0.62244300 | -0.00000100 |                       |         |         |        |         | <i>(With hindered internal rotation analysis)</i> |
| H                           | -1.99248600 | 0.68155700  | 0.87618800  |                       |         |         |        |         |                                                   |
| H                           | -1.99248800 | 0.68157200  | -0.87617100 |                       |         |         |        |         |                                                   |

pr02 CH<sub>3</sub>COCH·CH<sub>3</sub>

| T1 diagnostics: 0.016000900 |             |             |             | Harmonic frequencies: |         |         |        |         |         |
|-----------------------------|-------------|-------------|-------------|-----------------------|---------|---------|--------|---------|---------|
| Cartesian coordinates:      |             |             |             | 47.5                  | 979.55  | 1481.82 | 79.51  | 979.55  | 1481.82 |
| C                           | 0.50666300  | 0.14679700  | -0.00008400 | 89.19                 | 1037.89 | 1501.26 | 116.04 | 1037.89 | 1501.26 |
| O                           | 0.43177700  | 1.36979300  | -0.00002700 | 155.19                | 1050.27 | 1676.79 | 176.32 | 1050.27 | 1676.79 |
| C                           | 1.84367600  | -0.55975400 | 0.00004900  | 261.67                | 1149.97 | 3042.35 | 261.67 | 1149.97 | 3042.35 |
| H                           | 1.93361900  | -1.20035100 | -0.87817300 | 417.32                | 1227.25 | 3067.54 | 417.32 | 1227.25 | 3067.54 |
| H                           | 2.64246100  | 0.17561200  | -0.00135400 | 531.01                | 1384.81 | 3086.29 | 531.01 | 1384.81 | 3086.29 |
| H                           | 1.93455200  | -1.19778000 | 0.88005500  | 607.31                | 1395.01 | 3130.66 | 607.31 | 1395.01 | 3130.66 |
| C                           | -0.67944700 | -0.67574500 | -0.00013000 | 670.71                | 1440.39 | 3164.36 | 670.71 | 1440.39 | 3164.36 |
| H                           | -0.55674300 | -1.75165700 | -0.00019000 | 803.93                | 1471    | 3181.96 | 803.93 | 1471    | 3181.96 |
| C                           | -2.03963900 | -0.09671600 | 0.00006400  | 964.74                | 1479.14 | 3193.89 | 964.74 | 1479.14 | 3193.89 |
| H                           | -2.60343500 | -0.42993900 | 0.87552700  |                       |         |         |        |         |         |
| H                           | -1.98810300 | 0.98902700  | -0.00038600 |                       |         |         |        |         |         |
| H                           | -2.60408800 | -0.43074600 | -0.87465300 |                       |         |         |        |         |         |

*(With hindered internal rotation analysis)*

pr03 CH<sub>3</sub>COCH<sub>2</sub>CH<sub>2</sub>·

| T1 diagnostics: 0.014524166 |             |             |             | Harmonic frequencies: |         |         |        |         |         |
|-----------------------------|-------------|-------------|-------------|-----------------------|---------|---------|--------|---------|---------|
| Cartesian coordinates:      |             |             |             | 73.02                 | 955.21  | 1469.24 | 89.27  | 955.21  | 1469.24 |
| C                           | 0.46944300  | 0.17481000  | 0.01852100  | 105.07                | 1022.59 | 1481.46 | 126.08 | 1022.59 | 1481.46 |
| O                           | 0.37668300  | 1.37517900  | 0.02538300  | 174.09                | 1025.92 | 1850.9  | 180.10 | 1025.92 | 1850.9  |
| C                           | 1.80623700  | -0.52238900 | -0.04169900 | 275                   | 1129.04 | 2988.64 | 275    | 1129.04 | 2988.64 |
| H                           | 1.93435200  | -0.95425200 | -1.03622400 | 404                   | 1193.88 | 3029.04 | 404    | 1193.88 | 3029.04 |
| H                           | 2.60498200  | 0.18901200  | 0.14525700  | 418.18                | 1201.61 | 3067.44 | 418.18 | 1201.61 | 3067.44 |
| H                           | 1.84995300  | -1.34255500 | 0.67498600  | 472.72                | 1374.45 | 3132.55 | 472.72 | 1374.45 | 3132.55 |
| C                           | -0.74886000 | -0.73074600 | 0.06638600  | 596.97                | 1400.22 | 3182.84 | 596.97 | 1400.22 | 3182.84 |
| H                           | -0.62442300 | -1.50804600 | -0.69781700 | 766.8                 | 1430.56 | 3190.01 | 766.8  | 1430.56 | 3190.01 |
| H                           | -0.68228000 | -1.28221100 | 1.01647000  | 800.62                | 1451.89 | 3302.56 | 800.62 | 1451.89 | 3302.56 |
| C                           | -2.03932200 | -0.01974100 | -0.06465100 |                       |         |         |        |         |         |
| H                           | -2.96335100 | -0.57272000 | -0.11177900 |                       |         |         |        |         |         |
| H                           | -2.05768900 | 1.05774000  | -0.06529500 |                       |         |         |        |         |         |

*(With hindered internal rotation analysis)*
